# Supplementary material for: Catalytic asymmetric heterogeneous aziridination of styrene using Cu2+-exchanged zeolite Y: effect of the counter-cation on enantioselectivity and on the reaction profile
Source: Royal Society of Chemistry journal article supplement (doi:10.1039/b410932p), 2004-01-01
Supplement: b410932p.pdf [file b410932p.pdf]

Supplementary Material for New Journal of Chemistry  
This journal is © The Royal Society of Chemistry and  
The Centre National de la Recherche Scientifique, 2004

## **Supplementary Information**

**Catalytic asymmetric heterogeneous aziridination of styrene using  
Cu<sup>2+</sup>-exchanged zeolite Y : effect of counter cation**

John Gullick, Darragh Ryan, Paul McMorn, Donald Bethell,

Frank King and Graham Hutchings

**Figure S1** Powder X-ray diffraction patterns of the group I containing Cu-exchanged zeolites. (a) Cu-Li/Y; (b) Cu-Na/Y; (c) Cu-K/Y; (d) Cu-Rb/Y; (e) Cu-Cs/Y.

**Figure S2**  $^{27}\text{Al}$  MAS nmr spectra of the group I containing Cu-exchanged zeolites. (a) Cu-Li/Y; (b) Cu-Na/Y; (c) Cu-K/Y; (d) Cu-Rb/Y; (e) Cu-Cs/Y.

**Figure S3** Thermogravimetric analysis of the group I containing Cu-exchanged zeolites. (a) Cu-Li/Y; (b) Cu-Na/Y; (c) Cu-K/Y; (d) Cu-Rb/Y; (e) Cu-Cs/Y.

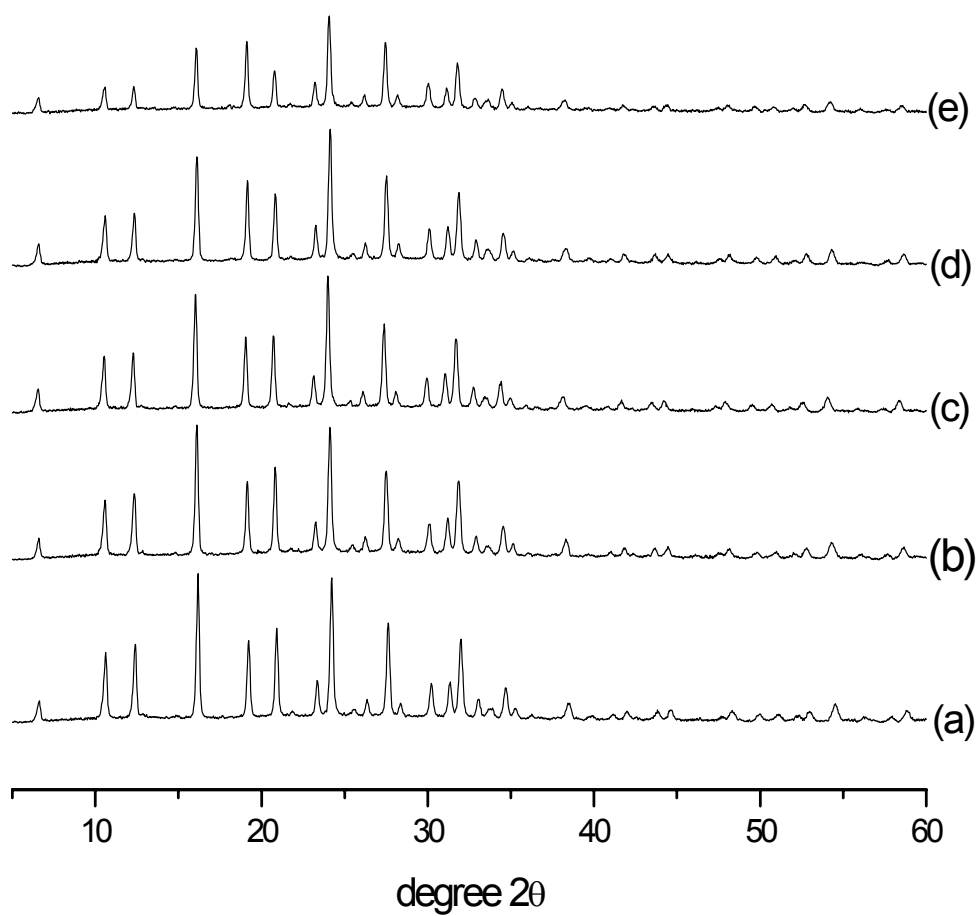

**Figure S1: (a) CuLiY, (b) CuNaY, (c) CuKY, (d) CuRbY, (e) CuCsY**

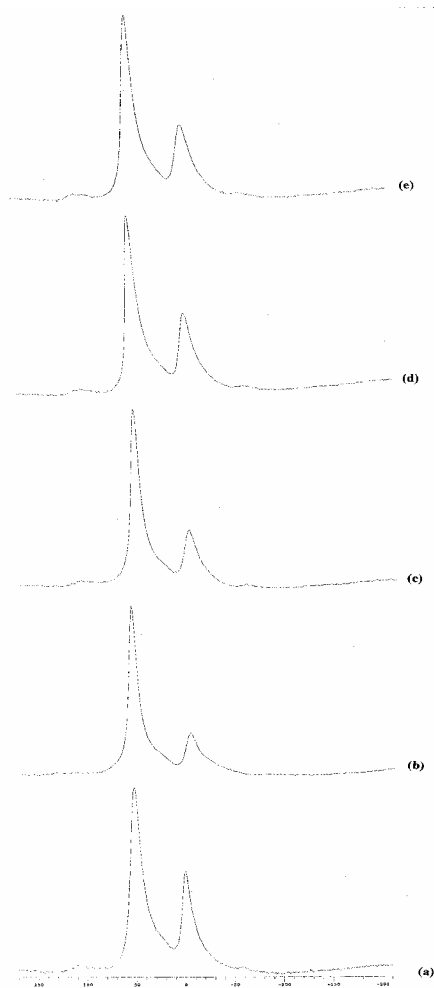

**Figure S2: (a) CuLiY, (b) CuNaY, (c) CuKY, (d) CuRbY, (e) CuCsY**

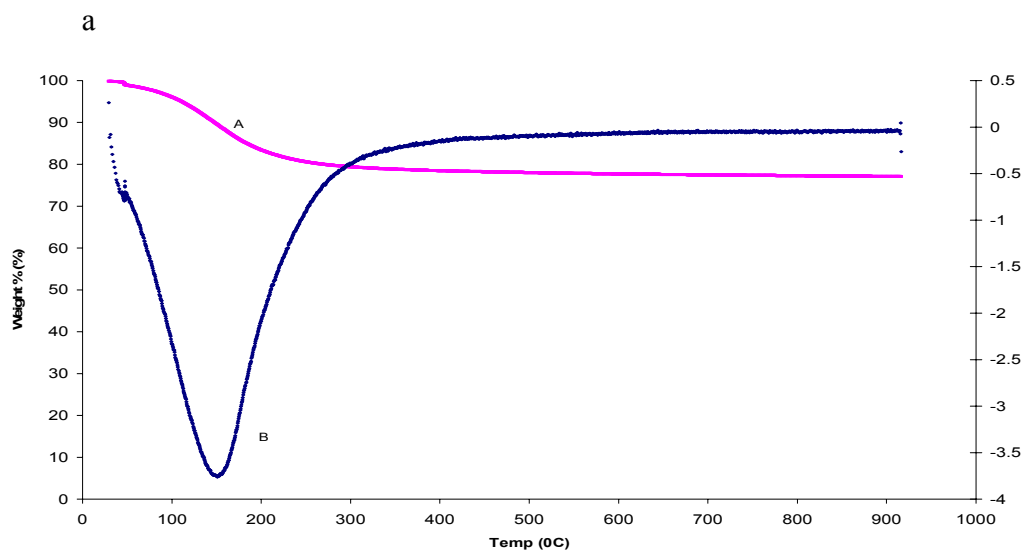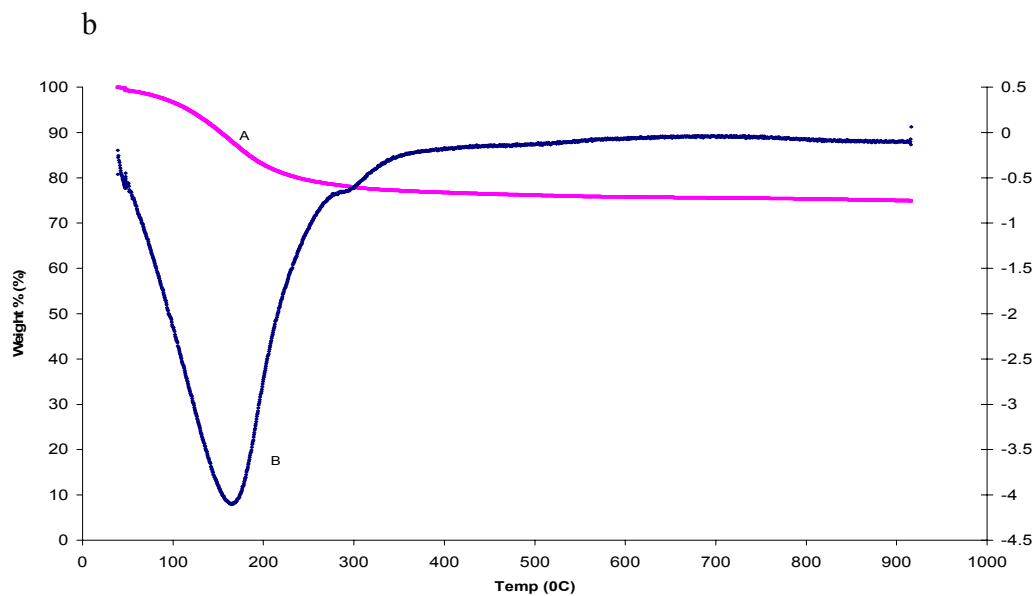

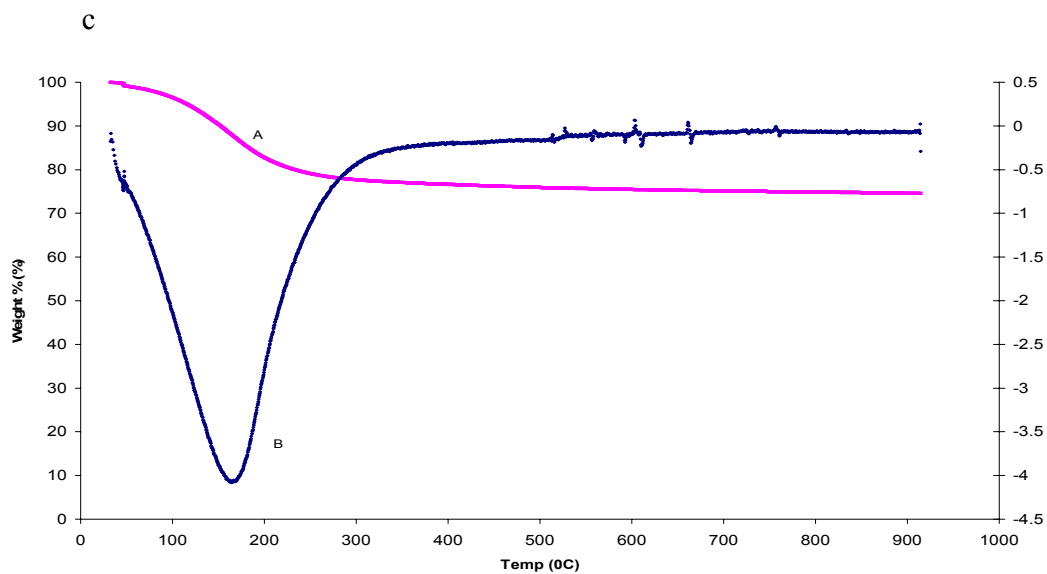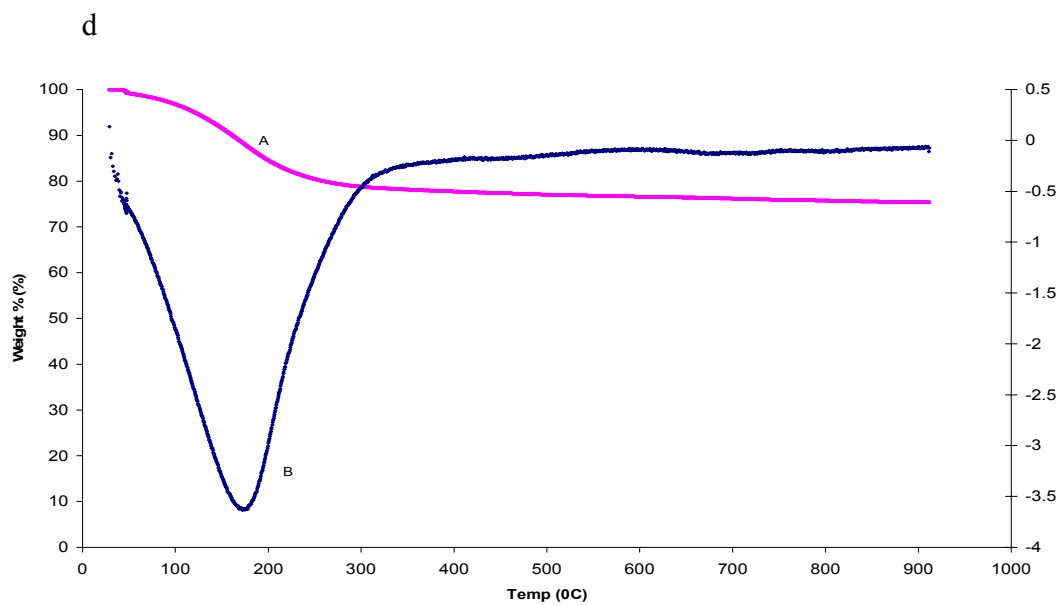

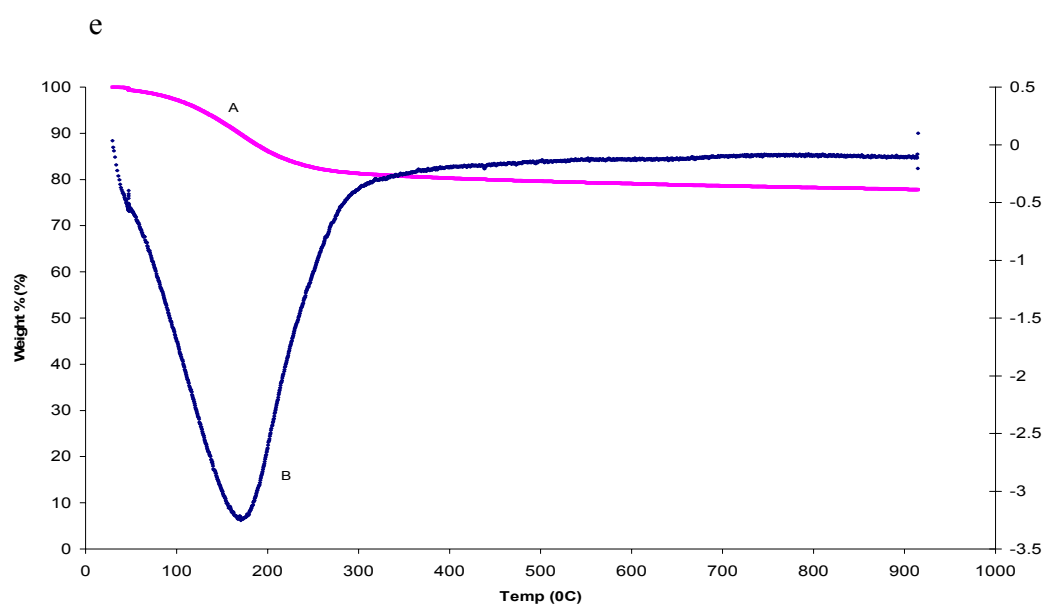

**Key: A: weight loss, B: derivative of weight loss**

**Figure S3: (a) CuLiY, (b) CuNaY, (c) CuKY, (d) CuRbY, (e) CuCsY**

Supplementary Material for New Journal of Chemistry  
This journal is © The Royal Society of Chemistry and  
The Centre National de la Recherche Scientifique, 2004
